# Supplementary material for: Early vaccination protects against childhood leukemia: A systematic review and meta-analysis
Source: PubMed Central journal article supplement (PMC5700199; doi:10.1038/s41598-017-16067-0), 2017-11-22
Supplement: 41598_2017_16067_MOESM1_ESM.pdf [file 41598_2017_16067_MOESM1_ESM.pdf]

# Early vaccination protects against childhood leukemia: A systematic review and meta-analysis

**Mostafa Ebraheem Morra<sup>1,⊕</sup>, Nguyen Dang Kien<sup>2,⊕</sup>, Ahmed Elmaraezy<sup>1,⊕</sup>,  
Omar Ayman M Abdelaziz<sup>3</sup>, Ahmed Lotfy Elsayed<sup>4</sup>, Oday Halhouli<sup>5</sup>, Ahmed  
Mosaad Montasr<sup>6</sup>, Tran Le-Huy Vu<sup>7</sup>, Chau Ho<sup>8</sup>, Amr Sayed Foly<sup>9</sup>, Anh Phan  
Phi<sup>10</sup>, WessamMagdy Abdullah<sup>11</sup>, Marina Mikhail<sup>12</sup>, Elizabeth Milne<sup>13,\*</sup>, Kenji  
Hirayama<sup>14</sup>, Nguyen Tien Huy<sup>15,16\*</sup>**

**Supplementary Table 1: PRISMA 2009 checklist of items to include when reporting a systematic review or meta-analysis<sup>1</sup>.**

| Section/topic             | # | Checklist item                                                                                                                                                                                                                                                                                              | Reported on page # |
|---------------------------|---|-------------------------------------------------------------------------------------------------------------------------------------------------------------------------------------------------------------------------------------------------------------------------------------------------------------|--------------------|
| <b>TITLE</b>              |   |                                                                                                                                                                                                                                                                                                             |                    |
| Title                     | 1 | Identify the report as a systematic review, meta-analysis, or both.                                                                                                                                                                                                                                         | Page 1             |
| <b>ABSTRACT</b>           |   |                                                                                                                                                                                                                                                                                                             |                    |
| Structured summary        | 2 | Provide a structured summary including, as applicable: background; objectives; data sources; study eligibility criteria, participants, and interventions; study appraisal and synthesis methods; results; limitations; conclusions and implications of key findings; systematic review registration number. | Page 4             |
| <b>INTRODUCTION</b>       |   |                                                                                                                                                                                                                                                                                                             |                    |
| Rationale                 | 3 | Describe the rationale for the review in the context of what is already known.                                                                                                                                                                                                                              | Page 5             |
| Objectives                | 4 | Provide an explicit statement of questions being addressed with reference to participants, interventions, comparisons, outcomes, and study design (PICOS).                                                                                                                                                  | Page 6             |
| <b>METHODS</b>            |   |                                                                                                                                                                                                                                                                                                             |                    |
| Protocol and registration | 5 | Indicate if a review protocol exists, if and where it can be accessed (e.g., Web address), and, if available, provide registration information including registration number.                                                                                                                               | Page 6             |
| Eligibility criteria      | 6 | Specify study characteristics (e.g., PICOS, length of follow-up) and report characteristics (e.g., years considered, language, publication status) used as criteria for eligibility, giving rationale.                                                                                                      | Page 7             |
| Information sources       | 7 | Describe all information sources (e.g., databases with dates of coverage, contact with study authors to identify additional studies) in the search and date last searched.                                                                                                                                  | Page 6             |
| Search                    | 8 | Present full electronic search strategy for at least one database, including any limits used, such that it could be repeated.                                                                                                                                                                               | Page 6             |
| Study selection           | 9 | State the process for selecting studies (i.e., screening, eligibility, included in systematic review, and, if applicable, included in the meta-analysis).                                                                                                                                                   | Page 6-7           |

|                                    |    |                                                                                                                                                                                                                        |           |
|------------------------------------|----|------------------------------------------------------------------------------------------------------------------------------------------------------------------------------------------------------------------------|-----------|
| Data collection process            | 10 | Describe method of data extraction from reports (e.g., piloted forms, independently, in duplicate) and any processes for obtaining and confirming data from investigators.                                             | Page 7-8  |
| Data items                         | 11 | List and define all variables for which data were sought (e.g., PICOS, funding sources) and any assumptions and simplifications made.                                                                                  | Page 8    |
| Risk of bias in individual studies | 12 | Describe methods used for assessing risk of bias of individual studies (including specification of whether this was done at the study or outcome level), and how this information is to be used in any data synthesis. | Page 9-10 |
| Summary measures                   | 13 | State the principal summary measures (e.g., risk ratio, difference in means).                                                                                                                                          | NA        |
| Synthesis of results               | 14 | Describe the methods of handling data and combining results of studies, if done, including measures of consistency (e.g., $I^2$ ) for each meta-analysis.                                                              | Page 8    |

**Supplementary Table 2A: Quality assessment of clinical trials studies**

| Studies                 | Domain of Assessment |                        |          |                         |                             |       |
|-------------------------|----------------------|------------------------|----------|-------------------------|-----------------------------|-------|
|                         | Sequence Generation  | Allocation Concealment | Blinding | Incomplete Outcome Data | Selective Outcome Reporting | Other |
| <b>Comstock/1975</b>    | high                 | unclear                | high     | low                     | unclear                     | low   |
| <b>Sutherland /1982</b> | low                  | unclear                | low      | low                     | unclear                     | low   |

**Supplementary Table 2B: Quality assessment of case control studies**

| Studies              | Domain of Assessment |                             |          |                         |                                     |           |          |
|----------------------|----------------------|-----------------------------|----------|-------------------------|-------------------------------------|-----------|----------|
|                      | Subject Selection    |                             |          |                         |                                     |           |          |
| Author/year/ref      | Cases                | Adequacy of case definition | Controls | Comparability of groups | Ascertainment of exposure/treatment | Follow-up | Overall  |
| Dockerty/1999        | 2                    | 2                           | 2        | 2                       | 0                                   | 1         | High     |
| Crispen/1976         | 2                    | 1                           | 2        | 2                       | 0                                   | 1         | High     |
| Nishi/1989           | 1                    | 2                           | 2        | 0                       | 0                                   | 0         | High     |
| Groves/1999          | 2                    | 2                           | 2        | 2                       | 0                                   | 0         | High     |
| Von Kries/2000       | 2                    | 2                           | 2        | 2                       | 2                                   | 0         | high     |
| MacArthur/2008       | 2                    | 2                           | 2        | 2                       | 0                                   | 1         | High     |
| Mallol-Mesnard /2007 | 2                    | 2                           | 2        | 2                       | 0                                   | 1         | High     |
| Ma/2005              | 2                    | 2                           | 2        | 2                       | 0                                   | 1         | Moderate |
| Petridou/1997        | 1                    | 2                           | 2        | 2                       | 2                                   | 1         | High     |
| Salonen /1976        | 2                    | 2                           | 2        | 2                       | 0                                   | 1         | Moderate |
| Davignon/1971        | 2                    | 2                           | 2        | 2                       | 0                                   | 0         | High     |
| Máthé /1974          | 2                    | 1                           | 2        | 2                       | 0                                   | 0         | High     |

**Supplementary Figure 1:** Funnel plot of publication bias assessment in the meta-analysis of association between early vaccination and childhood leukemia.

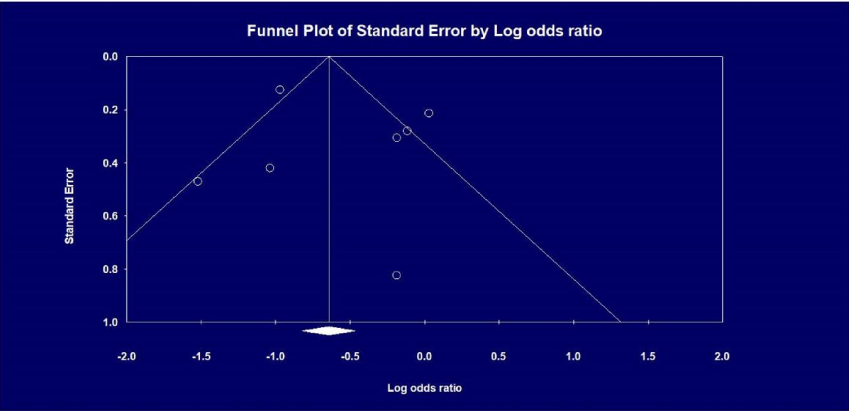

**Supplementary Figure 2:** The scatter-plot showing meta-regression of childhood leukemia on year of publication of BCG vaccination studies.

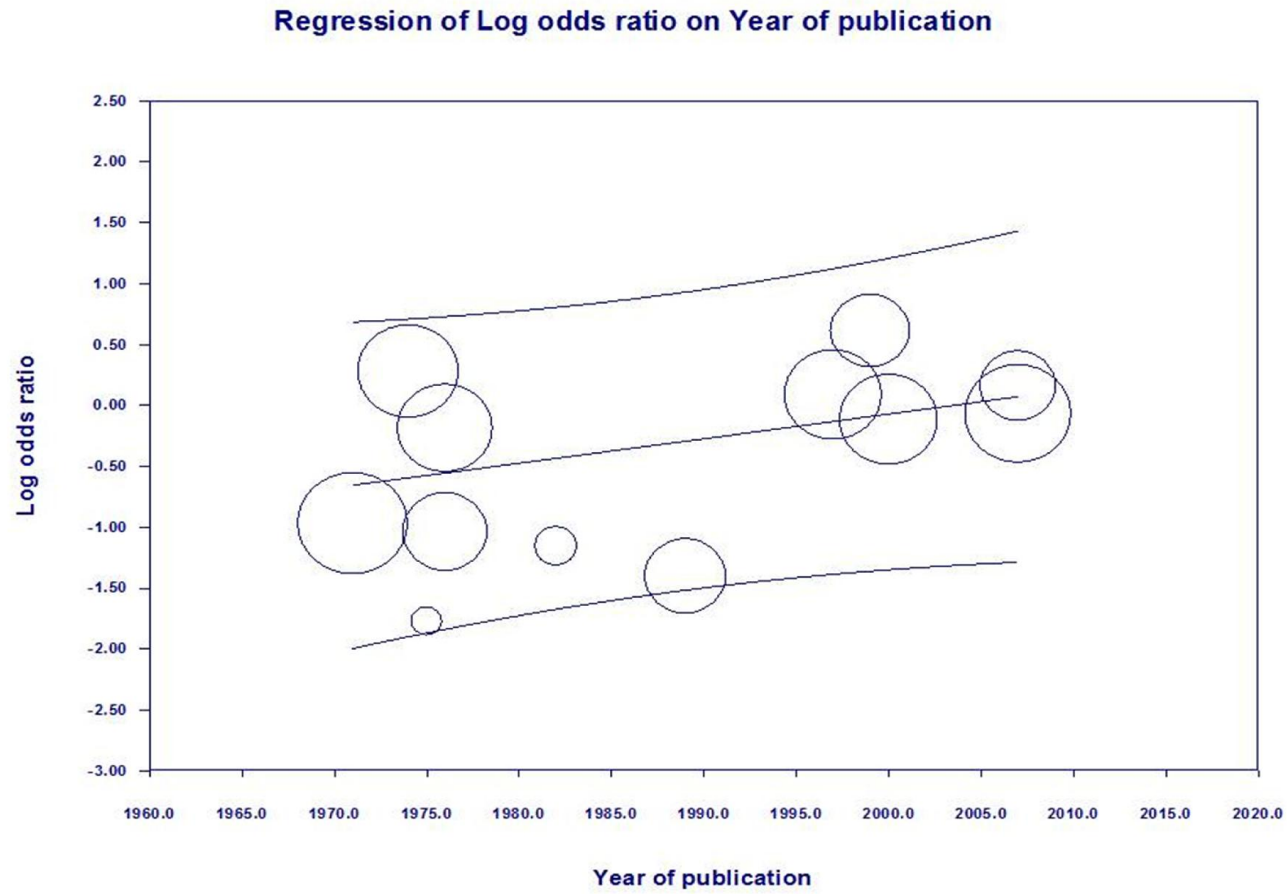

Supplementary Figure 3: Forest plot showing meta-analysis of mumps vaccination and subgroups meta-analysis.

### Mumps vaccination

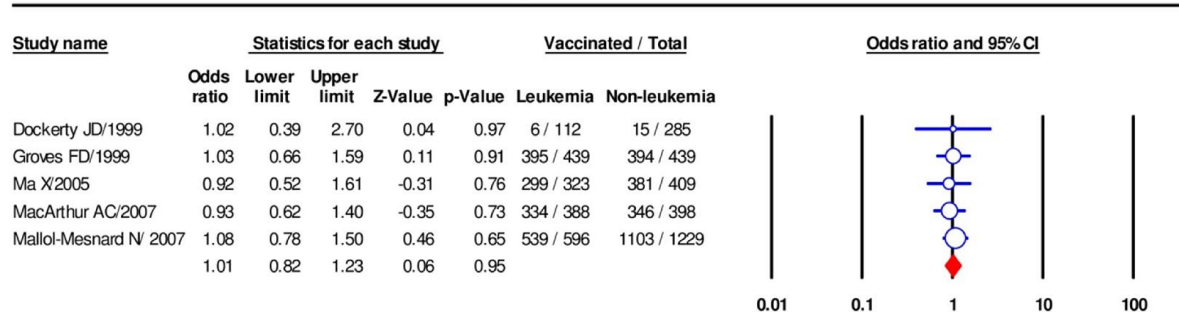



Supplementary Figure 4: Forest plot showing meta-analysis of HiB vaccination and subgroups meta-analysis.

### HiB vaccination

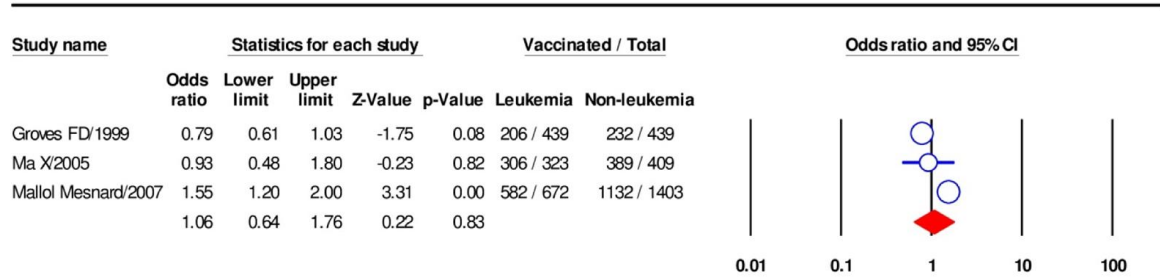

**Supplementary Figure 5:** Forest plot showing meta-analysis of rubella vaccination and subgroups meta-analysis.

### HBV vaccination

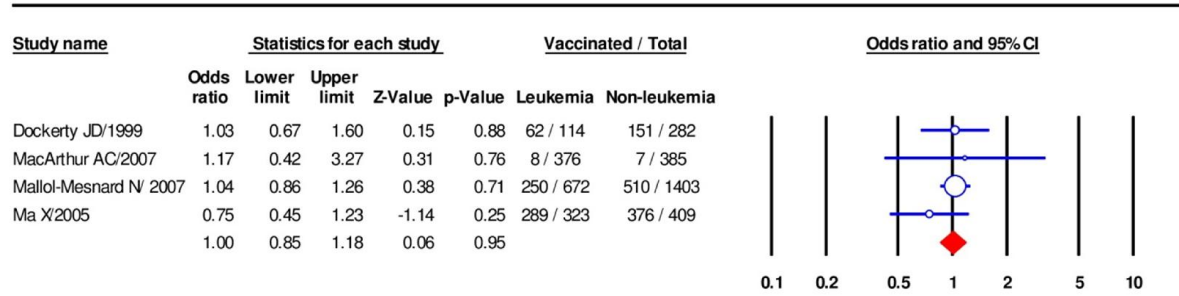

Supplementary Figure 6: Forest plot showing meta-analysis of triple vaccination and subgroups meta-analysis.

### Triple vaccination

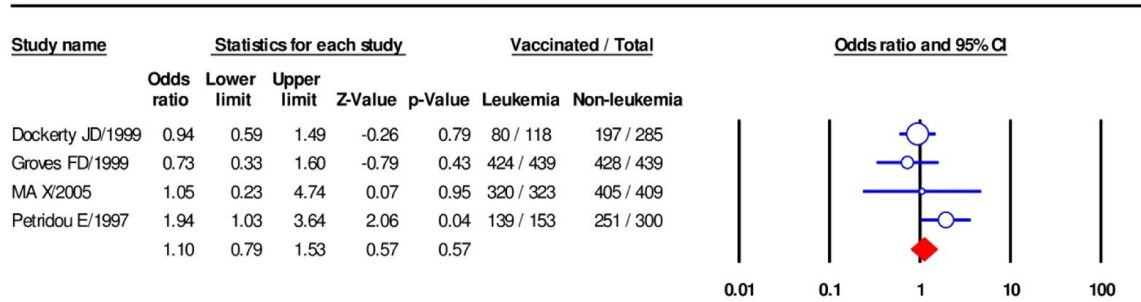

Supplementary Figure 7: Forest plot showing meta-analysis of polio sip vaccination and subgroups meta-analysis.

### Polio sip vaccination

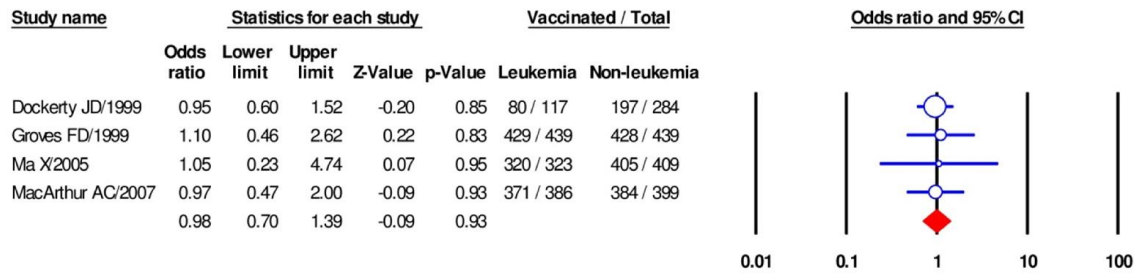

**Supplementary Figure 8:** Forest plot showing meta-analysis of MMR vaccination and subgroups meta-analysis.

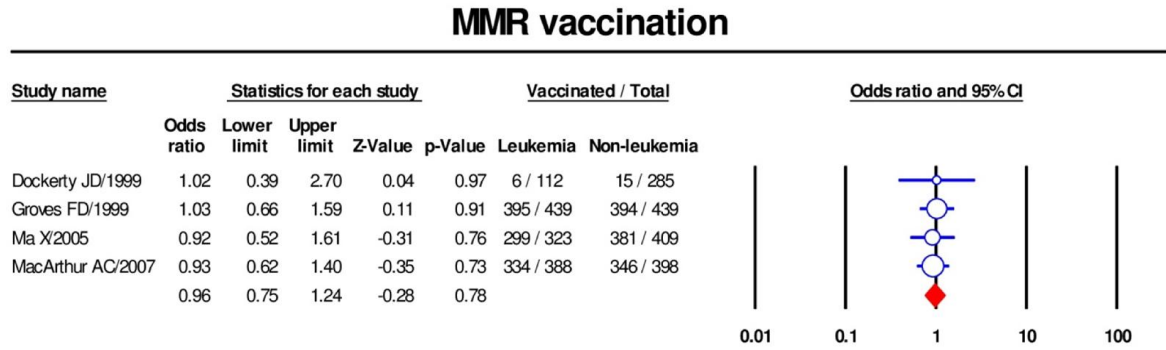

Supplementary Figure 9: Forest plot showing meta-analysis of measles vaccination and subgroups meta-analysis.

### Measles vaccination

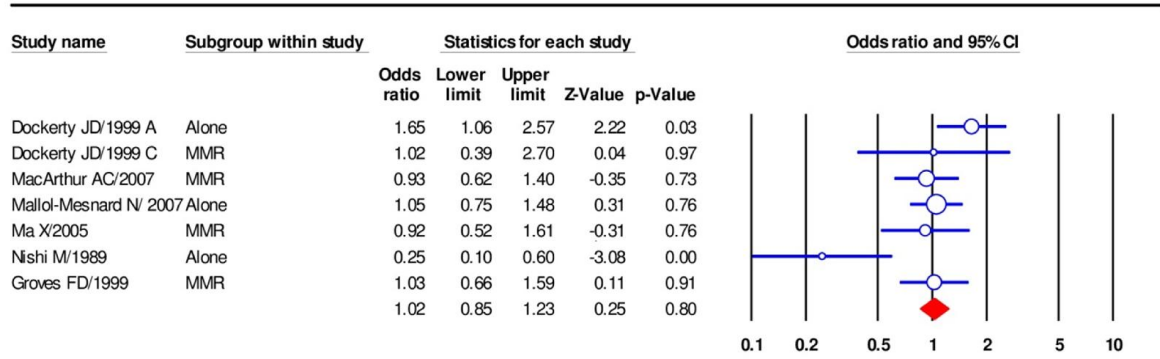

### Measles vaccination subgroups

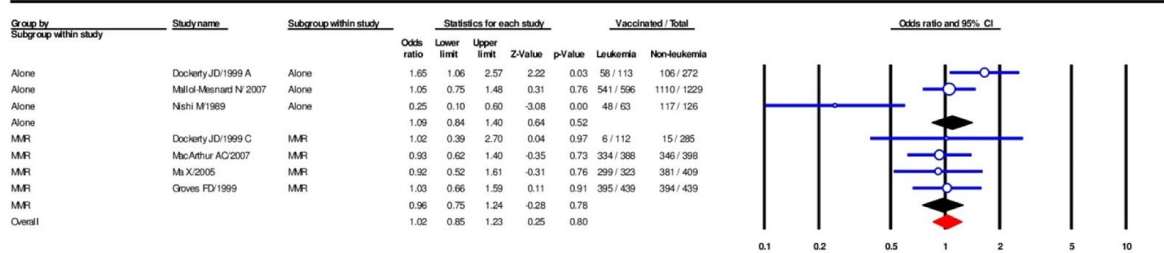



- 1 Moher, D., Liberati, A., Tetzlaff, J. & Altman, D. G. Preferred reporting items for systematic reviews and meta-analyses: the PRISMA statement. *Annals of internal medicine* **151**, 264-269 (2009).
